# Supplementary material for: NUP-98 Rearrangements Led to the Identification of Candidate Biomarkers for Primary Induction Failure in Pediatric Acute Myeloid Leukemia
Source: MDPI journal article supplement (doi:10.3390/ijms22094575), 2021-04-27
Supplement: s1 [file s1]

| 34 up-regulated |                 |                                       |                                                   |     | 76 down-regulated |                 |                                       |                                                   |       | 9 discordant |                 |                                       |                                                   |       |
|-----------------|-----------------|---------------------------------------|---------------------------------------------------|-----|-------------------|-----------------|---------------------------------------|---------------------------------------------------|-------|--------------|-----------------|---------------------------------------|---------------------------------------------------|-------|
| Gene name       | Transcript type | Linear FC<br>PIF (19) vs<br>PIR (175) | Linear FC<br>NUP98+ (21)<br>vs Other<br>AML (137) |     | Gene name         | Transcript type | Linear FC<br>PIF (19) vs<br>PIR (175) | Linear FC<br>NUP98+ (21)<br>vs Other<br>AML (137) |       | Gene name    | Transcript type | Linear FC<br>PIF (19) vs<br>PIR (175) | Linear FC<br>NUP98+ (21)<br>vs Other<br>AML (137) |       |
| 1               | RNU7-115P       | snRNA                                 | 22.1                                              | 2.5 | 1                 | GPR88           | Coding                                | -54.0                                             | -9.1  | 1            | CLDN10          | Coding                                | 6.2                                               | -13.0 |
| 2               | AC092171.1      | antisense                             | 9.7                                               | 2.5 | 2                 | CLIP3           | Coding                                | -51.8                                             | -42.4 | 2            | CHRN84          | Coding                                | 2.7                                               | -9.1  |
| 3               | TRGV2           | TR_V_gene                             | 9.3                                               | 4.1 | 3                 | XPNPEP2         | Coding                                | -20.5                                             | -6.8  | 3            | NA              | Coding                                | 2.7                                               | -2.2  |
| 4               | SPINK2          | Coding                                | 8.3                                               | 4.7 | 4                 | NA              | Coding                                | -20.5                                             | -16.9 | 4            | AC244035.1      | antisense                             | 2.5                                               | -5.5  |
| 5               | CCDC144CP       | pseudogene                            | 5.5                                               | 1.9 | 5                 | FLT4            | Coding                                | -20.1                                             | -55.3 | 5            | LINC01006       | processed transcript                  | 2.2                                               | -2.5  |
| 6               | AP002812.2      | antisense                             | 4.6                                               | 2.1 | 6                 | ALPK3           | Coding                                | -19.6                                             | -5.2  | 6            | GCH1            | Coding                                | -2.3                                              | 1.8   |
| 7               | TMA7            | Coding                                | 4.6                                               | 1.6 | 7                 | HSPG2           | Coding                                | -18.2                                             | -2.9  | 7            | GASK1B          | Coding                                | -3.4                                              | 3.0   |
| 8               | DEFA4           | Coding                                | 4.3                                               | 5.8 | 8                 | VIT             | Coding                                | -17.7                                             | -41.4 | 8            | STAB1           | Coding                                | -3.5                                              | 3.8   |
| 9               | SPCS2           | Coding                                | 4.2                                               | 1.5 | 9                 | RCOR2           | Coding                                | -17.6                                             | -10.4 | 9            | DEFA1           | Coding                                | -73.9                                             | 6.7   |
| 10              | CDCP1           | Coding                                | 4.0                                               | 2.4 | 10                | SEPN1           | Coding                                | -14.4                                             | -1.7  |              |                 |                                       |                                                   |       |
| 11              | ANP32E          | Coding                                | 4.0                                               | 2.2 | 11                | PODXL2          | Coding                                | -14.1                                             | -2.6  |              |                 |                                       |                                                   |       |
| 12              | LINC01881       | pseudogene                            | 4.0                                               | 1.5 | 12                | PACS1           | Coding                                | -11.5                                             | -1.5  |              |                 |                                       |                                                   |       |
| 13              | AC026124.1      | sense intronic                        | 3.6                                               | 2.5 | 13                | GLIS3           | Coding                                | -11.1                                             | -20.5 |              |                 |                                       |                                                   |       |
| 14              | CAPZA1          | Coding                                | 3.2                                               | 1.5 | 14                | GPR12           | Coding                                | -10.2                                             | -66.5 |              |                 |                                       |                                                   |       |
| 15              | NT5C3AP1        | pseudogene                            | 3.0                                               | 1.6 | 15                | CELSR3          | Coding                                | -10.1                                             | -2.2  |              |                 |                                       |                                                   |       |
| 16              | PAFAH1B2        | Coding                                | 2.8                                               | 1.6 | 16                | AADAT           | Coding                                | -9.5                                              | -6.5  |              |                 |                                       |                                                   |       |
| 17              | TRDMT1          | Coding                                | 2.7                                               | 1.6 | 17                | AC104809.2      | processed transcript                  | -9.2                                              | -15.2 |              |                 |                                       |                                                   |       |
| 18              | LGALS12         | Coding                                | 2.6                                               | 2.1 | 18                | LPAR5           | Coding                                | -8.8                                              | -5.8  |              |                 |                                       |                                                   |       |
| 19              | CCR6            | Coding                                | 2.6                                               | 3.0 | 19                | EVC2            | Coding                                | -7.9                                              | -17.9 |              |                 |                                       |                                                   |       |
| 20              | NRG4            | Coding                                | 2.4                                               | 3.6 | 20                | ABCD1           | Coding                                | -7.5                                              | -2.1  |              |                 |                                       |                                                   |       |
| 21              | GNB5            | Coding                                | 2.2                                               | 2.1 | 21                | GRAMD1A         | Coding                                | -7.3                                              | -1.9  |              |                 |                                       |                                                   |       |
| 22              | FGFR10P2        | Coding                                | 2.2                                               | 1.5 | 22                | SLC24A3         | Coding                                | -7.0                                              | -4.1  |              |                 |                                       |                                                   |       |
| 23              | TMEM241         | Coding                                | 2.2                                               | 1.6 | 23                | LRP5            | Coding                                | -6.7                                              | -2.0  |              |                 |                                       |                                                   |       |
| 24              | PCNT            | Coding                                | 2.2                                               | 1.5 | 24                | PAQR5           | Coding                                | -6.4                                              | -6.5  |              |                 |                                       |                                                   |       |
| 25              | NDUFA5          | Coding                                | 2.1                                               | 1.4 | 25                | RD3             | Coding                                | -6.2                                              | -47.7 |              |                 |                                       |                                                   |       |
| 26              | MAN1A2          | Coding                                | 2.1                                               | 1.6 | 26                | NTNG2           | Coding                                | -6.2                                              | -2.6  |              |                 |                                       |                                                   |       |
| 27              | GCNT1           | Coding                                | 2.1                                               | 2.0 | 27                | TRH             | Coding                                | -5.9                                              | -8.1  |              |                 |                                       |                                                   |       |
| 28              | NT5C3A          | Coding                                | 2.0                                               | 1.4 | 28                | DCHS1           | Coding                                | -5.8                                              | -7.4  |              |                 |                                       |                                                   |       |
| 29              | C9orf78         | Coding                                | 2.0                                               | 1.4 | 29                | KIF26B          | Coding                                | -5.8                                              | -3.7  |              |                 |                                       |                                                   |       |
| 30              | CPNE3           | Coding                                | 1.9                                               | 2.1 | 30                | AC239798.1      | lincRNA                               | -5.5                                              | -4.6  |              |                 |                                       |                                                   |       |
| 31              | SRP54           | Coding                                | 1.8                                               | 1.4 | 31                | FBLN2           | Coding                                | -5.4                                              | -2.9  |              |                 |                                       |                                                   |       |
| 32              | CCDC25          | Coding                                | 1.7                                               | 1.6 | 32                | ARHGEF17        | Coding                                | -5.3                                              | -4.3  |              |                 |                                       |                                                   |       |
| 33              | CTR9            | Coding                                | 1.7                                               | 1.6 | 33                | STK32B          | Coding                                | -5.2                                              | -4.4  |              |                 |                                       |                                                   |       |
| 34              | GOT1            | Coding                                | 1.4                                               | 1.7 | 34                | CAPN15          | Coding                                | -5.2                                              | -1.5  |              |                 |                                       |                                                   |       |
|                 |                 |                                       |                                                   |     | 35                | TSC2            | Coding                                | -5.2                                              | -1.4  |              |                 |                                       |                                                   |       |
|                 |                 |                                       |                                                   |     | 36                | MAP4K2          | Coding                                | -5.2                                              | -1.6  |              |                 |                                       |                                                   |       |
|                 |                 |                                       |                                                   |     | 37                | HDAC7           | Coding                                | -5.0                                              | -1.5  |              |                 |                                       |                                                   |       |
|                 |                 |                                       |                                                   |     | 38                | CENPV           | Coding                                | -4.9                                              | -2.2  |              |                 |                                       |                                                   |       |
|                 |                 |                                       |                                                   |     | 39                | WHRN (DFNB31)   | Coding                                | -4.8                                              | -7.4  |              |                 |                                       |                                                   |       |
|                 |                 |                                       |                                                   |     | 40                | CACNA2D2        | Coding                                | -4.8                                              | -9.7  |              |                 |                                       |                                                   |       |
|                 |                 |                                       |                                                   |     | 41                | KCTD15          | Coding                                | -4.7                                              | -2.6  |              |                 |                                       |                                                   |       |
|                 |                 |                                       |                                                   |     | 42                | SHB             | Coding                                | -4.5                                              | -3.0  |              |                 |                                       |                                                   |       |
|                 |                 |                                       |                                                   |     | 43                | MMP25-AS1       | antisense                             | -4.3                                              | -3.0  |              |                 |                                       |                                                   |       |
|                 |                 |                                       |                                                   |     | 44                | PALM            | Coding                                | -4.3                                              | -9.7  |              |                 |                                       |                                                   |       |
|                 |                 |                                       |                                                   |     | 45                | TNFRSF21        | Coding                                | -4.1                                              | -2.4  |              |                 |                                       |                                                   |       |
|                 |                 |                                       |                                                   |     | 46                | DAGLA           | Coding                                | -4.1                                              | -3.2  |              |                 |                                       |                                                   |       |
|                 |                 |                                       |                                                   |     | 47                | ROBO4           | Coding                                | -4.1                                              | -10.3 |              |                 |                                       |                                                   |       |
|                 |                 |                                       |                                                   |     | 48                | RNF217          | Coding                                | -4.0                                              | -3.1  |              |                 |                                       |                                                   |       |
|                 |                 |                                       |                                                   |     | 49                | VSIG4           | Coding                                | -4.0                                              | -18.0 |              |                 |                                       |                                                   |       |
|                 |                 |                                       |                                                   |     | 50                | ENPP3           | Coding                                | -4.0                                              | -5.9  |              |                 |                                       |                                                   |       |
|                 |                 |                                       |                                                   |     | 51                | RNF217-AS1      | antisense                             | -4.0                                              | -6.3  |              |                 |                                       |                                                   |       |
|                 |                 |                                       |                                                   |     | 52                | SAP25           | Coding                                | -3.9                                              | -1.6  |              |                 |                                       |                                                   |       |
|                 |                 |                                       |                                                   |     | 53                | DCLK2           | Coding                                | -3.8                                              | -5.1  |              |                 |                                       |                                                   |       |
|                 |                 |                                       |                                                   |     | 54                | ZNF704          | Coding                                | -3.8                                              | -5.0  |              |                 |                                       |                                                   |       |
|                 |                 |                                       |                                                   |     | 55                | HPGD            | Coding                                | -3.7                                              | -7.1  |              |                 |                                       |                                                   |       |
|                 |                 |                                       |                                                   |     | 56                | DNM1            | Coding                                | -3.7                                              | -3.5  |              |                 |                                       |                                                   |       |
|                 |                 |                                       |                                                   |     | 57                | MMP28           | Coding                                | -3.6                                              | -8.1  |              |                 |                                       |                                                   |       |
|                 |                 |                                       |                                                   |     | 58                | ZNF467          | Coding                                | -3.3                                              | -3.1  |              |                 |                                       |                                                   |       |
|                 |                 |                                       |                                                   |     | 59                | ATP2A1          | Coding                                | -3.3                                              | -2.5  |              |                 |                                       |                                                   |       |
|                 |                 |                                       |                                                   |     | 60                | ARHGEF40        | Coding                                | -3.2                                              | -2.1  |              |                 |                                       |                                                   |       |
|                 |                 |                                       |                                                   |     | 61                | TANC1           | Coding                                | -3.2                                              | -10.9 |              |                 |                                       |                                                   |       |
|                 |                 |                                       |                                                   |     | 62                | PKN1            | Coding                                | -3.1                                              | -1.3  |              |                 |                                       |                                                   |       |
|                 |                 |                                       |                                                   |     | 63                | LOXHD1          | Coding                                | -3.1                                              | -11.8 |              |                 |                                       |                                                   |       |
|                 |                 |                                       |                                                   |     | 64                | TRIO            | Coding                                | -3.1                                              | -1.8  |              |                 |                                       |                                                   |       |
|                 |                 |                                       |                                                   |     | 65                | KDM4B           | Coding                                | -3.0                                              | -1.6  |              |                 |                                       |                                                   |       |
|                 |                 |                                       |                                                   |     | 66                | TRAK1           | Coding                                | -3.0                                              | -1.4  |              |                 |                                       |                                                   |       |
|                 |                 |                                       |                                                   |     | 67                | USP2            | Coding                                | -3.0                                              | -5.5  |              |                 |                                       |                                                   |       |
|                 |                 |                                       |                                                   |     | 68                | ZFYVE9          | Coding                                | -2.9                                              | -5.7  |              |                 |                                       |                                                   |       |
|                 |                 |                                       |                                                   |     | 69                | POU6F1          | Coding                                | -2.4                                              | -2.6  |              |                 |                                       |                                                   |       |
|                 |                 |                                       |                                                   |     | 70                | PRRT4           | Coding                                | -2.3                                              | -7.1  |              |                 |                                       |                                                   |       |
|                 |                 |                                       |                                                   |     | 71                | NAV1            | Coding                                | -2.2                                              | -8.1  |              |                 |                                       |                                                   |       |
|                 |                 |                                       |                                                   |     | 72                | SCMH1           | Coding                                | -2.1                                              | -1.8  |              |                 |                                       |                                                   |       |
|                 |                 |                                       |                                                   |     | 73                | SPTAN1          | Coding                                | -2.1                                              | -1.7  |              |                 |                                       |                                                   |       |
|                 |                 |                                       |                                                   |     | 74                | LPAR2           | Coding                                | -1.9                                              | -1.7  |              |                 |                                       |                                                   |       |
|                 |                 |                                       |                                                   |     | 75                | ZCCHC14         | Coding                                | -1.8                                              | -1.9  |              |                 |                                       |                                                   |       |
|                 |                 |                                       |                                                   |     | 76                | VGLL4           | Coding                                | -1.4                                              | -1.8  |              |                 |                                       |                                                   |       |

Table S1. NUP98/PIF-associated DEGs: 34 upregulated (on the left); 76 downregulated (in the middle); 9 discordant (on the right, excluded for next analysis).

| TARGET      |                 |                 |         |         |      |                     |
|-------------|-----------------|-----------------|---------|---------|------|---------------------|
| Gene symbol | Sensitivity (%) | Specificity (%) | PPV (%) | NPV (%) | AUC  | <i>p</i> -value AUC |
| RNU7-115P   | 94.7            | 99.4            | 94.7    | 99.4    | 1.00 | <0.0001             |
| AC092171.1  | 94.7            | 93.1            | 60.0    | 99.4    | 0.97 | <0.0001             |
| TRGV2       | 84.2            | 85.7            | 39.0    | 98.0    | 0.87 | <0.0001             |
| SPINK2      | 78.9            | 86.3            | 38.5    | 97.4    | 0.89 | <0.0001             |
| CCDC144CP   | 89.5            | 82.9            | 44.7    | 98.6    | 0.93 | <0.0001             |
| AP002812.2  | 84.2            | 84.0            | 36.4    | 98.0    | 0.90 | <0.0001             |
| TMA7        | 100.0           | 100.0           | 100.0   | 100.0   | 1.00 | <0.0001             |
| DEFA4       | 78.9            | 70.9            | 22.7    | 96.9    | 0.79 | <0.0001             |
| SPCS2       | 94.7            | 100.0           | 100.0   | 99.4    | 0.99 | <0.0001             |
| CDCP1       | 52.6            | 89.7            | 35.7    | 94.6    | 0.76 | 0.0002              |
| ANP32E      | 100.0           | 92.6            | 59.4    | 100.0   | 0.99 | <0.0001             |
| LINC01881   | 94.7            | 95.4            | 69.2    | 99.4    | 0.97 | <0.0001             |
| AC026124.1  | 73.7            | 78.9            | 27.5    | 96.5    | 0.76 | 0.0002              |
| CAPZA1      | 89.5            | 94.9            | 65.4    | 98.8    | 0.95 | <0.0001             |
| NT5C3AP1    | 94.7            | 84.6            | 40.0    | 99.3    | 0.95 | <0.0001             |
| PAFAH1B2    | 84.2            | 86.9            | 41.0    | 98.1    | 0.91 | <0.0001             |
| TRDMT1      | 100.0           | 78.3            | 33.3    | 100.0   | 0.94 | <0.0001             |
| LGALS12     | 84.2            | 68.6            | 22.5    | 97.6    | 0.76 | <0.0001             |
| CCR6        | 47.4            | 89.7            | 33.3    | 94.0    | 0.64 | 0.0452              |
| NRG4        | 89.5            | 68.6            | 23.6    | 98.7    | 0.78 | <0.0001             |
| GNB5        | 84.2            | 85.7            | 39.0    | 98.0    | 0.89 | <0.0001             |
| FGFR1OP2    | 84.2            | 90.3            | 48.5    | 98.1    | 0.92 | <0.0001             |
| TMEM241     | 94.7            | 78.3            | 32.1    | 99.3    | 0.92 | <0.0001             |
| PCNT        | 89.5            | 82.9            | 36.2    | 98.6    | 0.90 | <0.0001             |
| NDUFA5      | 78.9            | 95.4            | 65.2    | 97.7    | 0.93 | <0.0001             |
| MAN1A2      | 73.7            | 90.3            | 45.2    | 96.9    | 0.89 | <0.0001             |
| GCNT1       | 63.2            | 84.0            | 30.0    | 95.5    | 0.83 | <0.0001             |
| NT5C3A      | 89.5            | 88.6            | 45.9    | 98.7    | 0.93 | <0.0001             |
| C9orf78     | 100.0           | 86.3            | 44.2    | 100.0   | 0.97 | <0.0001             |
| CPNE3       | 94.7            | 68.6            | 24.7    | 99.2    | 0.84 | <0.0001             |
| SRP54       | 84.2            | 90.9            | 50.0    | 98.1    | 0.91 | <0.0001             |
| CCDC25      | 73.7            | 88.0            | 40.0    | 96.9    | 0.84 | <0.0001             |
| CTR9        | 94.7            | 61.1            | 20.9    | 99.1    | 0.82 | <0.0001             |
| GOT1        | 84.2            | 68.6            | 22.5    | 97.6    | 0.82 | <0.0001             |

Table S2. A) Sensitivity, Specificity, Positive Predictive Value (PPV) and Negative Predictive Values (NPV) for all 34 upregulated highly confident NUP98/PIF-associated DEGs. All indices were calculated using best cut-off in Roc Curve for distinguishing PIF and PIR patients.

| Gene symbol | Sensitivity (%) | Specificity (%) | PPV (%) | NPV (%) | AUC  | p-value AUC |
|-------------|-----------------|-----------------|---------|---------|------|-------------|
| CACNA2D2    | 68.4            | 51.4            | 13.3    | 93.8    | 0.64 | 0.0505      |
| CELSR3      | 84.2            | 73.1            | 25.4    | 97.7    | 0.86 | <0.0001     |
| SCMH1       | 89.5            | 34.3            | 12.9    | 96.8    | 0.68 | 0.0102      |
| USP2        | 89.5            | 28.0            | 11.9    | 96.1    | 0.52 | 0.7291      |
| FLT4        | 68.4            | 80.6            | 27.7    | 95.9    | 0.81 | <0.0001     |
| TRIO        | 89.5            | 47.4            | 15.6    | 97.6    | 0.71 | 0.0022      |
| HDAC7       | 94.7            | 80.6            | 34.6    | 99.3    | 0.91 | <0.0001     |
| LPAR2       | 68.4            | 55.4            | 14.3    | 94.2    | 0.58 | 0.2325      |
| GRAMD1A     | 100.0           | 88.6            | 48.7    | 100.0   | 0.96 | <0.0001     |
| DFNB31      | 78.9            | 64.6            | 19.5    | 96.6    | 0.74 | 0.0007      |
| PALM        | 94.7            | 25.1            | 12.1    | 97.8    | 0.56 | 0.4286      |
| LRP5L       | 5.3             | 62.9            | 1.5     | 85.9    | 0.62 | 0.0897      |
| ABCD1       | 31.6            | 89.7            | 25.0    | 92.4    | 0.90 | <0.0001     |
| TSC2        | 94.7            | 88.0            | 46.2    | 99.4    | 0.94 | <0.0001     |
| CAPN15      | 100.0           | 74.9            | 30.2    | 100.0   | 0.92 | <0.0001     |
| CLIP3       | 94.7            | 42.9            | 15.3    | 98.7    | 0.68 | 0.0095      |
| DNM1        | 89.5            | 44.0            | 14.8    | 97.5    | 0.72 | 0.0021      |
| GLIS3       | 47.4            | 88.0            | 30.0    | 93.9    | 0.68 | 0.0097      |
| SHB         | 73.7            | 70.3            | 21.2    | 96.1    | 0.75 | 0.0003      |
| AADAT       | 68.4            | 86.3            | 35.1    | 96.2    | 0.81 | <0.0001     |
| ARHGEF17    | 57.9            | 88.0            | 34.4    | 95.1    | 0.79 | <0.0001     |
| PODXL2      | 94.7            | 66.3            | 23.4    | 99.1    | 0.87 | <0.0001     |
| TANC1       | 47.4            | 42.9            | 8.3     | 88.2    | 0.51 | 0.8922      |
| XPNPEP2     | 68.4            | 89.7            | 41.9    | 96.3    | 0.81 | <0.0001     |
| PKN1        | 73.7            | 80.6            | 29.2    | 96.6    | 0.81 | <0.0001     |
| KDM4B       | 89.5            | 57.1            | 18.5    | 98.0    | 0.72 | 0.0016      |
| MMP28       | 10.5            | 69.1            | 3.6     | 87.7    | 0.51 | 0.8549      |
| GPR12       | 68.4            | 71.4            | 20.6    | 95.4    | 0.70 | 0.0034      |
| NAV1        | 89.5            | 29.1            | 12.1    | 96.2    | 0.53 | 0.6499      |
| DAGLA       | 94.7            | 36.6            | 14.0    | 98.5    | 0.68 | 0.0114      |
| ALPK3       | 73.7            | 94.3            | 58.3    | 97.1    | 0.89 | <0.0001     |
| PAQR5       | 52.6            | 87.4            | 31.3    | 94.4    | 0.71 | 0.0028      |
| ZCCHC14     | 84.2            | 36.0            | 12.5    | 95.5    | 0.55 | 0.4633      |
| HSPG2       | 94.7            | 80.0            | 34.0    | 99.3    | 0.92 | <0.0001     |
| VGLL4       | 10.5            | 69.1            | 3.6     | 87.7    | 0.55 | 0.4425      |
| TNFRSF21    | 94.7            | 43.4            | 15.4    | 98.7    | 0.67 | 0.0133      |
| RNF217      | 73.7            | 64.0            | 18.2    | 95.7    | 0.69 | 0.0069      |
| STK32B      | 78.9            | 57.7            | 16.9    | 96.2    | 0.67 | 0.0146      |

| Gene symbol   | Sensitivity (%) | Specificity (%) | PPV (%) | NPV (%) | AUC  | p-value AUC |
|---------------|-----------------|-----------------|---------|---------|------|-------------|
| KCTD15        | 57.9            | 85.7            | 30.6    | 94.9    | 0.76 | 0.0002      |
| ROBO4         | 57.9            | 87.4            | 33.3    | 95.0    | 0.67 | 0.0148      |
| ENPP3         | 89.5            | 22.9            | 11.2    | 95.2    | 0.72 | 0.0013      |
| VSIG4         | 63.2            | 56.0            | 13.5    | 93.3    | 0.52 | 0.7814      |
| ZFYVE9        | 100.0           | 87.4            | 46.3    | 100.0   | 0.59 | 0.1761      |
| SEPN1         | 78.9            | 58.9            | 17.2    | 96.3    | 0.97 | <0.0001     |
| KIF26B        | 73.7            | 37.1            | 11.3    | 92.9    | 0.71 | 0.0022      |
| HPGDS         | 89.5            | 50.9            | 16.5    | 97.8    | 0.53 | 0.6546      |
| FBLN2         | 47.4            | 81.7            | 22.0    | 93.5    | 0.73 | 0.0008      |
| ZNF704        | 94.7            | 58.3            | 19.8    | 99.0    | 0.65 | 0.0381      |
| ANXA8         | 68.4            | 74.3            | 22.4    | 95.6    | 0.76 | 0.0002      |
| ARHGEF40      | 57.9            | 92.0            | 44.0    | 95.3    | 0.72 | 0.0015      |
| DCHS1         | 94.7            | 70.3            | 25.7    | 99.2    | 0.77 | 0.0001      |
| CENPV         | 42.1            | 90.3            | 32.0    | 93.5    | 0.88 | <0.0001     |
| LOXHD1        | 68.4            | 89.7            | 41.9    | 96.3    | 0.66 | 0.0266      |
| RCOR2         | 100.0           | 74.3            | 29.7    | 100.0   | 0.83 | <0.0001     |
| MAP4K2        | 42.1            | 78.3            | 17.4    | 92.6    | 0.90 | <0.0001     |
| DCLK2         | 68.4            | 65.7            | 17.8    | 95.0    | 0.57 | 0.3277      |
| TRH           | 47.4            | 69.1            | 14.3    | 92.4    | 0.68 | 0.0111      |
| EVC2          | 100.0           | 95.4            | 70.4    | 100.0   | 0.57 | 0.3214      |
| PACS1         | 78.9            | 60.6            | 17.9    | 96.4    | 0.99 | <0.0001     |
| ZNF467        | 68.4            | 82.9            | 30.2    | 96.0    | 0.71 | 0.0025      |
| GPR88         | 89.5            | 68.0            | 23.3    | 98.3    | 0.79 | <0.0001     |
| TRAK1         | 89.5            | 38.9            | 13.7    | 97.1    | 0.80 | <0.0001     |
| POU6F1        | 26.3            | 82.9            | 14.3    | 91.2    | 0.64 | 0.0476      |
| LPAR5         | 63.2            | 71.4            | 19.4    | 94.7    | 0.85 | <0.0001     |
| SLC24A3       | 89.5            | 62.3            | 20.5    | 98.2    | 0.71 | 0.0027      |
| ATP2A1        | 84.2            | 68.0            | 22.2    | 97.5    | 0.73 | 0.0008      |
| NTNG2         | 89.5            | 53.1            | 17.2    | 97.9    | 0.80 | <0.0001     |
| SPTAN1        | 89.5            | 37.1            | 13.4    | 97.0    | 0.62 | 0.0938      |
| RD3           | 78.9            | 44.0            | 13.3    | 95.1    | 0.62 | 0.0753      |
| VIT           | 31.6            | 90.9            | 27.3    | 92.4    | 0.61 | 0.1189      |
| SAP25         | 78.9            | 27.4            | 10.6    | 92.3    | 0.89 | <0.0001     |
| AC104809.2    | 73.7            | 49.7            | 13.7    | 94.6    | 0.52 | 0.7259      |
| PRRT4         | 84.2            | 50.9            | 15.7    | 96.7    | 0.62 | 0.0865      |
| RP11-403I13.9 | 68.4            | 64.0            | 17.1    | 94.9    | 0.66 | 0.0206      |
| RP11-510H23.1 | 84.2            | 62.3            | 19.5    | 97.3    | 0.61 | 0.1105      |
| RP11-473M20.7 | 78.9            | 53.1            | 15.5    | 95.9    | 0.73 | 0.0008      |

Table S2. B) Sensitivity, Specificity, Positive Predictive Value (PPV) and Negative Predictive Values (NPV) for all 76 downregulated highly confident NUP98/PIF-associated DEGs. All indices were calculated using best cut-off in Roc Curve for distinguishing PIF and PIR patients.

| Gene name     | TARGET<br>program                 | Adj. <i>p-value</i> | TARGET<br>program        | Adj. <i>p-value</i> | Noort Study<br>Linear             | Adj. <i>p-value</i> |
|---------------|-----------------------------------|---------------------|--------------------------|---------------------|-----------------------------------|---------------------|
|               | Linear                            |                     | Linear                   |                     | FoldChange                        |                     |
|               | FoldChange<br>NUP98+ vs<br>NUP98- |                     | FoldChange<br>PIF vs PIR |                     | NUP98-NSD1+<br>vs NUP98-<br>NSD1- |                     |
| Upregulated   |                                   |                     |                          |                     |                                   |                     |
| NRG4          | 3.6                               | 0.0006800           | 2.4                      | 0.0073354           | 15.9                              | 2.30E-16            |
| DEFA4         | 5.8                               | 0.0006774           | 4.3                      | 0.0016807           | 3.7                               | 0.0003144           |
| SPINK2        | 4.7                               | 0.0002229           | 8.3                      | 2.16E-11            | 19.6                              | 8.01E-14            |
| CPNE3         | 2.1                               | 0.0006891           | 1.9                      | 0.0032273           | 2.1                               | 0.0000009           |
| LGALS12       | 2.1                               | 0.0229131           | 2.6                      | 0.0001047           | 3.1                               | 1.38E-08            |
| CDCP1         | 2.4                               | 0.0268617           | 4.0                      | 4.13E-07            | 8.1                               | 1.82E-15            |
| RP11-305O6.3  | 2.5                               | 0.0042777           | 3.6                      | 6.47E-07            | 2.9                               | 0.0000095           |
| GCNT1         | 2.0                               | 0.0044462           | 2.1                      | 0.0002831           | 2.7                               | 1.74E-12            |
| Downregulated |                                   |                     |                          |                     |                                   |                     |
| XPNPEP2       | -6.8                              | 0.0025736           | -20.5                    | 7.21E-07            | -3.5                              | 1.18E-09            |
| RCOR2         | -10.4                             | 7.79E-06            | -17.6                    | 3.62E-08            | -5.9                              | 6.36E-12            |
| CELSR3        | -2.2                              | 0.0260854           | -10.1                    | 1.74E-11            | -2.1                              | 2.69E-07            |
| FLT4          | -55.3                             | 9.77E-09            | -20.1                    | 1.40E-05            | -4.4                              | 0.0000051           |
| DFNB31        | -7.4                              | 7.30E-11            | -4.8                     | 1.06E-06            | -2.8                              | 3.81E-09            |
| FBLN2         | -2.9                              | 0.0345421           | -5.4                     | 0.0007283           | -4.1                              | 1.41E-07            |
| VIT           | -41.4                             | 0.0027521           | -17.7                    | 0.0090988           | -2.6                              | 0.0001133           |
| GPR12         | -66.5                             | 2.31E-06            | -10.2                    | 0.0044818           | -6.1                              | 1.39E-07            |
| EVC2          | -17.9                             | 0.0010810           | -7.9                     | 0.0126903           | -4.0                              | 0.0000072           |
| PRRT4         | -7.1                              | 1.75E-06            | -2.3                     | 0.0243112           | -3.4                              | 0.0000033           |
| POU6F1        | -2.6                              | 1.98E-06            | -2.4                     | 3.83E-05            | -2.6                              | 1.72E-16            |
| GLIS3         | -20.5                             | 0.0001184           | -11.1                    | 0.0005791           | -4.0                              | 0.0000048           |
| LOXHD1        | -11.8                             | 4.05E-05            | -3.1                     | 0.0470452           | -2.7                              | 0.0057301           |
| DCHS1         | -7.4                              | 3.05E-07            | -5.8                     | 1.70E-05            | -4.3                              | 6.37E-12            |
| DCLK2         | -5.1                              | 0.0132501           | -3.8                     | 0.0219993           | -3.6                              | 0.0000083           |
| ALPK3         | -5.2                              | 0.0016214           | -19.6                    | 1.52E-08            | -3.4                              | 1.64E-08            |
| RP11-403I13.9 | -4.6                              | 0.0467955           | -5.5                     | 0.0117711           | -3.0                              | 0.0000176           |
| CACNA2D2      | -9.7                              | 0.0001959           | -4.8                     | 0.0031621           | -5.1                              | 4.90E-10            |
| RP11-510H23.1 | -6.3                              | 0.0053864           | -4.0                     | 0.0278720           | -3.6                              | 0.0000011           |
| LPAR5         | -5.8                              | 1.23E-07            | -8.8                     | 2.59E-09            | -2.3                              | 5.94E-08            |
| ZFYVE9        | -5.7                              | 0.0001245           | -2.9                     | 0.0154511           | -4.7                              | 4.19E-10            |
| USP2          | -5.5                              | 0.0032263           | -3.0                     | 0.0401788           | -7.1                              | 1.02E-14            |
| KCTD15        | -2.6                              | 0.0016137           | -4.7                     | 1.78E-07            | -3.3                              | 9.71E-10            |
| TANC1         | -10.9                             | 4.79E-05            | -3.2                     | 0.0214368           | -2.4                              | 0.0011365           |
| NAV1          | -8.1                              | 9.53E-08            | -2.2                     | 0.0496939           | -2.6                              | 0.0000136           |
| AADAT         | -6.5                              | 0.0013006           | -9.5                     | 0.0003850           | -10.9                             | 4.53E-13            |
| RNF217        | -3.1                              | 0.0399202           | -4.0                     | 0.0043638           | -6.1                              | 3.60E-08            |
| ZNF704        | -5.0                              | 0.0054430           | -3.8                     | 0.0065976           | -28.1                             | 4.03E-29            |
| SLC24A3       | -4.1                              | 0.0234298           | -7.0                     | 0.0014564           | -3.1                              | 0.0005889           |
| TRH           | -8.1                              | 0.0066287           | -5.9                     | 0.0090749           | -2.7                              | 0.0402381           |
| HPGD          | -7.1                              | 0.0011962           | -3.7                     | 0.0108997           | -10.6                             | 7.78E-18            |

Table S3. Thirty-nine differentially expressed genes in three different groups: NUP98+ vs NUP98- and PIF vs PIR from TARGET program, then NUP98-NSD1+ vs NUP98-NSD1- from Noort study. We show 8 upregulated and 31 downregulated transcripts, obtained by crossing our list of 110 NUP98/PIF-associated DEGs and 3026 NUP98-NSD1 differentially expressed genes reported by Noort et al.

|                                                                 | AIEOP LAM<br>2002/01 | TARGET PROGRAM |                | LOCAL COHORT |           |
|-----------------------------------------------------------------|----------------------|----------------|----------------|--------------|-----------|
|                                                                 | Total AML patients   | PIF            | PIR            | PIF          | PIR       |
| <b>Patients, <i>n</i> (%)</b>                                   | 482                  | 19             | 175            | 4            | 8         |
| <b>Gender (male/female)</b>                                     | 262 (52%)/ 220       | 12 (63%)/ 7    | 91(52%)/<br>84 | 0/4          | 4/4       |
| <b>Age at diagnosis</b>                                         |                      |                |                |              |           |
| < 1 year                                                        | 63 (13%)             | 0              | 8 (4%)         | 0            | 0         |
| 1-2 years                                                       | 52 (10%)             | 3 (16%)        | 17 (10%)       | 0            | 0         |
| 2-10 years                                                      | 181 (38%)            | 8 (42%)        | 63 (36%)       | 2 (50%)      | 3 (37,5%) |
| > 10 years                                                      | 186 (39%)            | 8 (42%)        | 87 (50%)       | 2 (50%)      | 5 (62,5%) |
| <b>WBC at diagnosis (×10<sup>9</sup>/l)</b>                     |                      |                |                |              |           |
| <10                                                             | 171 (35%)            | 2 (10%)        | 19 (11%)       | 2 (50%)      | 5 (62,5%) |
| 10-99                                                           | 236 (49%)            | 10 (53%)       | 116 (66%)      | 2 (50%)      | 3 (37,5%) |
| >100                                                            | 75 (16%)             | 7 (37%)        | 40 (23%)       | 0            | 0         |
| <b>FAB Subtype</b>                                              |                      |                |                |              |           |
| M0                                                              | 34 (7%)              | 3 (16%)        | 1 (0,6 %)      | 0            | 0         |
| M1                                                              | 88 (18%)             | 1 (5%)         | 25 (14%)       | 3 (75%)      | 2 (25%)   |
| M2                                                              | 91 (19%)             | 4 (21%)        | 42 (24%)       | 1 (25%)      | 2 (25%)   |
| M4                                                              | 83 (17%)             | 2 (11%)        | 44 (25%)       | 0            | 2 (25%)   |
| M5                                                              | 117 (24%)            | 3 (16%)        | 33 (19%)       | 0            | 1 (12,5%) |
| M6                                                              | 5 (1%)               | 0              | 3 (2%)         | 0            | 0         |
| M7                                                              | 44 (9%)              | 1 (5%)         | 6 (3,4%)       | 0            | 1 (12,5%) |
| Unclassifiable/not known                                        | 20 (4%)              | 5 (26%)        | 21 (12%)       | 0            | 0         |
| <b>Patients with available<br/>cytogenetic data</b>             | 418                  |                |                |              |           |
| Normal                                                          | 166 (39%)            | 7 (37%)        | 46 (26%)       |              |           |
| <i>t</i> (8;21), <i>t</i> (16;16) or <i>inv</i> (16)            | 99 (24%)             | 1 (5%)         | 55 (31%)       | 0            | 0         |
| <i>t</i> (9;11) or MLL-t                                        | 65 (15%)             | 2 (11%)        | 31 (18%)       | 0            | 0         |
| NUP98-rearrangements                                            | 25 (5%)              | 4 (21%)        | 12 (7%)        | 1 (25%)      | 4 (50%)   |
| Other                                                           | 61 (15%)             | 9 (47%)        | 34 (19%)       | 1 (25%)      | 6 (75%)   |
| Complex karyotype*                                              | 27 (6%)              | 1 (5%)         | 23 (13%)       | 1 (25%)      | 2 (25%)   |
| Unknown                                                         | 0                    | 0              | 9 (5%)         | 1 (25%)      | 0         |
| <b>Patients tested for<br/>molecular aberrations</b>            | 384                  |                |                |              |           |
| <i>FLT3</i> -ITD                                                | 42 (11%)             | 3 (16%)        | 21 (12%)       | 0            | 5 (62,5%) |
| <i>FLT3</i> activating loop<br>mutations                        | 10 (3%)              | 2 (11%)        | 14 (8%)        | 0            | 0         |
| <b>Other molecular<br/>aberration</b>                           | 244                  |                |                |              |           |
| <i>NPM1</i> mutations                                           | 14 (6%)              | 0              | 11 (6%)        | 0            | 0         |
| <i>CEBPA</i> mutations                                          | 18 (7%)              | 0              | 17 (10%)       | 0            | 0         |
| <i>WT1</i>                                                      | NA                   | 4 (21%)        | 9 (5%)         | 0            | 0         |
| *Complex Karyotype, ≥ 3 abnormalities (numerical or structural) |                      |                |                |              |           |

Table S4. **Characteristics of patients with AML included in our study.** PIF: Primary Induction Failure; PIR: Primary Induction Response; Number of cases (% of cases per category); N.A: not available; \* Complex karyotype: ≥ than 3 chromosomal abnormalities numerical or structural).

|                                                  | TARGET PROGRAM |           |
|--------------------------------------------------|----------------|-----------|
|                                                  | NUP98r+        | NUP98r-   |
| <b>Patients, n (%)</b>                           | 21             | 137       |
| <b>Gender (male/female)</b>                      | 15/ 6          | 70/ 67    |
| <b>Age at diagnosis</b>                          |                |           |
| < 1 year                                         | 0              | 11        |
| 1-2 years                                        | 3              | 13        |
| 2-10 years                                       | 9              | 46        |
| > 10 years                                       | 9              | 67        |
| <b>WBC at diagnosis (×10<sup>9</sup>/l)</b>      |                |           |
| <10                                              | 4              | 14        |
| 10-99                                            | 11             | 89        |
| >100                                             | 6              | 34        |
| <b>FAB Subtype</b>                               |                |           |
| M0                                               | 0              | 3         |
| M1                                               | 2              | 11        |
| M2                                               | 7              | 35        |
| M4                                               | 4              | 37        |
| M5                                               | 4              | 34        |
| M6                                               | 2              | 0         |
| M7                                               | 1              | 4         |
| Unclassifiable/not known                         | 1              | 13        |
| <b>Overall Survival (days)</b>                   | 1214           | Undefined |
| <b>Patients with available cytogenetic data</b>  |                |           |
| Normal                                           | 12             | 7         |
| <i>t(8;21), t(16;16) or inv(16)</i>              | 0              | 68        |
| <i>t(9;11) or MLL-t</i>                          | 0              | 39        |
| NUP98-rearrangements                             | 21             | 0         |
| Other                                            | 7              | 20        |
| Complex karyotype*                               | 3              | 11        |
| Unknown                                          | 1              | 3         |
| <b>Patients tested for molecular aberrations</b> |                |           |
| <i>FLT3</i> -ITD                                 | 9              | 7         |
| <i>FLT3</i> activating loop mutations            | 0              | 10        |
| <b>Other molecular aberration</b>                |                |           |
| <i>NPM1</i> mutations                            | 0              | 0         |
| <i>CEBPA</i> mutations                           | 1              | 1         |
| <i>WT1</i>                                       | 6              | 6         |

Table S5. Clinical and pathological features and molecular alterations of selected TARGET samples, analyzed by transcriptome analysis and subdivided in NUP98r positive and NUP98r negative patients

| Transcript<br>(Accession<br>number) | Forward Primer                  | Reverse Primer                     | Annealing<br>Temperature | Fragment<br>size |
|-------------------------------------|---------------------------------|------------------------------------|--------------------------|------------------|
| SPINK2<br>(NM_001271718.2)          | 2F-<br>TCCCTCAATTGGTCTGTTTC     | 3R-CCTTCCCTGATTTTCATGCAC           | 60°C                     | 151 bp           |
| TMA7<br>(NM_183250.2)               | 2F-<br>AGAAGCAGGCCAAGGAGATG     | 4R<br>GCCAGATTTCCTTAATCCACCTG      | 59°C                     | 140 bp           |
| SPCS2<br>(NM_014752.3)              | 2F<br>TGACAAGTGGGATGGATCAGC     | 3R TACAGATGGTGAGGCGACCA            | 58°C                     | 122 bp           |
| CDCP1<br>(NM_022842.5)              | 4F-<br>TCAACCTCTCTCTGCAAGGC     | 5R-CGCTCATTACTCAAGTCAACC           | 58°C                     | 133 bp           |
| CAPZA1<br>(NM_006135.3)             | 7F<br>ACCATCACACCACCTACAGC      | 9-10R<br>TCACTAATTGCTGTCTGATACTCAT | 60°C                     | 197 bp           |
| FGFR1OP2<br>(NM_015633.3)           | 3F-<br>ACGGTCCACGTTAGTTATGG     | 4R-AAGTTCCAAGGCCGACTGAT            | 56°C                     | 115 bp           |
| MAN1A2<br>(NM_006699.5)             | 12F<br>ATTGCCGAGTTAATGGTGGGT    | 13R<br>TCGAACAGCAGGATTACCTGA       | 57°C                     | 233 bp           |
| NT5C3A<br>(NM_001002010.5)          | 7F-<br>AACATAGCATCCCCGTGTTC     | 7/8R-AATCCTTTGAGCACCCCAGTT         | 57°C                     | 145 bp           |
| SRP54<br>(NM_003136.4)              | 9F<br>CATGCAAAAGGAGGTGGTGC      | 11R<br>TCAGTCCTTCAATGTCGCCC        | 57°C                     | 154 bp           |
| MALAT1<br>(NR_002819.4)             | 3endF-<br>AAAGCAAGGTCTCCCCACAAG | 3endF-<br>GGTCTGTGCTAGATCAAAAGGCA  | 61°C                     | 73 bp            |

Table S6. Primers details used for qRT-PCR
